# Supplementary material for: Collective dynamics support group drumming, reduce variability, and stabilize tempo drift
Source: eLife. 2022 Nov 1;11:e74816. doi: 10.7554/eLife.74816 (PMC9678363; doi:10.7554/eLife.74816)
Supplement: Figure 3—source data 1. [file elife-74816-fig3-data1.xlsx]

## Sheet: fig 3
Panel A
Group Size	Individuals	Condition	Mean	SEM	n
2	Individuals	Solo	0.0442386	0.00148547	88
2	Individuals	Ensemble	0.0509773	0.00187654	88
2	Group-Aggregate	Ensemble	0.0340227	0.00177649	44
4	Individuals	Solo	0.0415045	0.00135633	111
4	Individuals	Ensemble	0.0522091	0.00152642	110
4	Group-Aggregate	Ensemble	0.0364688	0.00482746	32
8	Individuals	Solo	NA	NA	0
8	Individuals	Ensemble	0.0570042	0.000452019	953
8	Group-Aggregate	Ensemble	0.0280075	0.00115443	133
Panel B
Group Size	Individuals	Condition	Mean	SEM	n
2	Individuals	Solo	0.0414143	0.000487803	200
2	Individuals	Ensemble	0.0420228	0.00576327	198
2	Group-Aggregate	Ensemble	0.0399909	0.00206308	99
4	Individuals	Solo	0.0405644	0.000316856	400
4	Individuals	Ensemble	0.0777836	0.00821336	400
4	Group-Aggregate	Ensemble	0.0338992	0.00216775	100
8	Individuals	Solo	0.0407287	0.000207189	800
8	Individuals	Ensemble	0.095848	0.00750477	688
8	Group-Aggregate	Ensemble	0.0277461	0.00158154	86

## Sheet: fig 3-figure supplement 1
Panel A
Group Size	Individuals	Condition	Mean	SEM	n
2	Individuals	Solo	0.0442386	0.00148547	88
4	Individuals	Solo	0.0415045	0.00135633	111
8	Individuals	Solo	NA	NA	0
2	Group-Aggregate	Solo	0.231932	0.0105535	44
4	Group-Aggregate	Solo	0.264156	0.00959304	32
8	Group-Aggregate	Solo	NA	NA	0
2	Individuals	Ensemble	0.0509773	0.00187654	88
4	Individuals	Ensemble	0.0522091	0.00152642	110
8	Individuals	Ensemble	0.0570042	0.000452019	953
2	Group-Aggregate	Ensemble	0.0340227	0.00177649	44
4	Group-Aggregate	Ensemble	0.0364688	0.00482746	32
8	Group-Aggregate	Ensemble	0.0280075	0.00115443	133
Panel B
Group Size	Individuals	Condition	Mean	SEM	n
2	Individuals	Solo	0.0414143	0.000487803	200
4	Individuals	Solo	0.0405644	0.000316856	400
8	Individuals	Solo	0.0407287	0.000207189	800
2	Group-Aggregate	Solo	0.183988	0.00445524	100
4	Group-Aggregate	Solo	0.20899	0.00295694	100
8	Group-Aggregate	Solo	0.215319	0.0017719	100
2	Individuals	Ensemble	0.0420228	0.00576327	198
4	Individuals	Ensemble	0.0777836	0.00821336	400
8	Individuals	Ensemble	0.095848	0.00750477	688
2	Group-Aggregate	Ensemble	0.0399909	0.00206308	99
4	Group-Aggregate	Ensemble	0.0338992	0.00216775	100
8	Group-Aggregate	Ensemble	0.0277461	0.00158154	86

## Sheet: fig 3-figure supplement 2
Panel A
Group Size	Individuals	Condition	Mean	SEM	n
2	Individuals	Solo	0.0414657	0.000487505	200
2	Individuals	Ensemble	0.0397049	0.00160578	200
2	Group-Aggregate	Ensemble	0.0607135	0.00407966	100
4	Individuals	Solo	0.0408449	0.000305262	400
4	Individuals	Ensemble	0.0379237	0.00144732	400
4	Group-Aggregate	Ensemble	0.0463906	0.00406711	100
8	Individuals	Solo	0.0417762	0.000981743	800
8	Individuals	Ensemble	0.039372	0.00131213	800
8	Group-Aggregate	Ensemble	0.0450156	0.00413041	100
Panel B
Group Size	Individuals	Condition	Mean	SEM	n
2	Individuals	Solo	0.0410702	0.000492657	200
2	Individuals	Ensemble	0.0488707	0.00630002	198
2	Group-Aggregate	Ensemble	0.0422341	0.00323678	99
4	Individuals	Solo	0.0410174	0.00030817	400
4	Individuals	Ensemble	0.0801148	0.00650835	396
4	Group-Aggregate	Ensemble	0.0666356	0.00573872	99
8	Individuals	Solo	0.0408941	0.000232403	800
8	Individuals	Ensemble	0.0860502	0.00123301	784
8	Group-Aggregate	Ensemble	0.171778	0.00529702	98
