# Supplementary material for: Collective dynamics support group drumming, reduce variability, and stabilize tempo drift
Source: eLife. 2022 Nov 1;11:e74816. doi: 10.7554/eLife.74816 (PMC9678363; doi:10.7554/eLife.74816)
Supplement: Figure 4—source data 1. [file elife-74816-fig4-data1.xlsx]

## Sheet: fig 4
Group Size	Individuals	Condition	Mean	SEM	n
2	Individuals	Solo	0.0241136	0.00741115	88
4	Individuals	Solo	0.0131261	0.00649988	111
8	Individuals	Solo	NA	NA	0
2	Individuals	Ensemble	0.0425227	0.00703763	88
4	Individuals	Ensemble	0.0387091	0.0029776	110
8	Individuals	Ensemble	0.0208568	0.00220032	482

## Sheet: fig 4-figure supplement 1
Panel A
Individuals	Condition	BPM	Group Size	Mean	SEM	n
Individuals	Ensemble	50	2	0.0501818	0.017523	22
Individuals	Ensemble	50	4	0.0458806	0.0125703	31
Individuals	Ensemble	80	2	0.0336818	0.0226622	22
Individuals	Ensemble	80	4	0.0486071	0.00777058	28
Individuals	Ensemble	80	8	0.0610574	0.00477047	122
Individuals	Ensemble	100	8	0.0626355	0.00435188	107
Individuals	Ensemble	120	2	0.0671818	0.0110551	22
Individuals	Ensemble	120	4	0.0233846	0.003648	26
Individuals	Ensemble	120	8	0.0207236	0.00216792	123
Individuals	Ensemble	160	2	0.0459545	0.00876151	22
Individuals	Ensemble	160	4	0.0447857	0.00590385	28
Individuals	Ensemble	160	8	0.000842105	0.00406454	114
Individuals	Ensemble	200	2	0.0232727	0.0075705	22
Individuals	Ensemble	200	4	0.0369643	0.00455521	28
Individuals	Ensemble	200	8	-0.000333333	0.00369691	123
Individuals	Ensemble	240	2	-0.00277273	0.00452838	22
Individuals	Ensemble	240	4	0.0120741	0.00423825	27
Panel B
Individuals	Condition	BPM	Group Size	Mean	SEM	n
Individuals	Ensemble	50	2	0.0454227	0.00266144	22
Individuals	Ensemble	50	4	0.0460484	0.00230881	31
Individuals	Ensemble	80	2	0.0484091	0.00329348	22
Individuals	Ensemble	80	4	0.0509643	0.00263648	28
Individuals	Ensemble	80	8	0.0571393	0.0014761	122
Individuals	Ensemble	100	8	0.0615981	0.00164264	107
Individuals	Ensemble	120	2	0.0555455	0.00568271	22
Individuals	Ensemble	120	4	0.0442692	0.00214085	26
Individuals	Ensemble	120	8	0.0566179	0.00117021	123
Individuals	Ensemble	160	2	0.05	0.00302658	22
Individuals	Ensemble	160	4	0.0561786	0.00283032	28
Individuals	Ensemble	160	8	0.0549123	0.00116684	114
Individuals	Ensemble	200	2	0.0499545	0.00215671	22
Individuals	Ensemble	200	4	0.0568571	0.00380014	28
Individuals	Ensemble	200	8	0.0589431	0.00125558	123
Individuals	Ensemble	240	2	0.0544091	0.00202009	22
Individuals	Ensemble	240	4	0.0560741	0.00309071	27
