# Supplementary material for: Collective dynamics support group drumming, reduce variability, and stabilize tempo drift
Source: eLife. 2022 Nov 1;11:e74816. doi: 10.7554/eLife.74816 (PMC9678363; doi:10.7554/eLife.74816)
Supplement: Figure 5—source data 1. [file elife-74816-fig5-data1.xlsx]

## Sheet: fig 5
Panel A
Group Size	Lag	Mean	95 % CI		n
2	1	-0.305805	-0.33555	-0.277794	88
2	2	0.00191127	-0.0224472	0.0270489	88
2	3	-0.0563306	-0.0790736	-0.0308445	88
2	4	0.0729864	0.0477953	0.0978324	88
4	1	-0.260605	-0.296055	-0.223275	110
4	2	-0.0211682	-0.0515314	0.0124146	110
4	3	-0.0474679	-0.0734153	-0.0208924	110
4	4	0.0825254	0.0591928	0.108958	110
8	1	-0.208809	-0.221937	-0.195507	474
8	2	-0.0695202	-0.080781	-0.0582896	474
8	3	-0.0440729	-0.0536236	-0.034817	474
8	4	0.0251398	0.0151751	0.035182	474
Panel B
Group Size	Lag	Mean	95 % CI		n
2	1	-0.215858	-0.266706	-0.163419	44
2	2	0.0660704	0.032948	0.100544	44
2	3	-0.027233	-0.0711539	0.0125683	44
2	4	0.108239	0.0748012	0.148408	44
4	1	-0.233172	-0.284219	-0.176258	32
4	2	0.0156583	-0.0241803	0.0537382	32
4	3	-0.0311154	-0.0654016	0.005836	32
4	4	0.0803866	0.0441722	0.118334	32
8	1	-0.152788	-0.189496	-0.115841	66
8	2	0.0302573	0.00594042	0.0560018	66
8	3	0.0033888	-0.0188787	0.0264726	66
8	4	0.0510892	0.0273745	0.0740591	66

## Sheet: fig 5-figure supplement 1
Panel	BPM	Group Size	Lag	Mean	95 % CI		n
50	50	2	1	-0.375071	-0.429617	-0.316185	20
	50	2	2	0.122485	0.0674664	0.176843	20
	50	2	3	-0.0601766	-0.115901	-0.00693416	20
	50	2	4	0.0130672	-0.0530536	0.0713089	20
	50	2	5	-0.0653326	-0.12022	-0.00729011	20
	50	2	6	0.00665815	-0.0407417	0.0600361	20
	50	2	7	-0.064299	-0.128231	0.00481053	20
	50	2	8	-0.0427327	-0.0973744	0.00748768	20
	50	4	1	-0.39452	-0.458733	-0.329094	14
	50	4	2	0.050924	0.0113257	0.091645	14
	50	4	3	-0.0752161	-0.14333	-0.00756639	14
	50	4	4	0.0103999	-0.0537725	0.0821645	14
	50	4	5	-0.0408634	-0.0858502	0.00568596	14
	50	4	6	0.0276442	-0.0340593	0.0835556	14
	50	4	7	-0.000608141	-0.057669	0.0571646	14
	50	4	8	-0.060045	-0.119366	0.00429305	14
80	80	2	1	-0.351642	-0.394931	-0.306182	22
	80	2	2	0.0132134	-0.0420732	0.0698805	22
	80	2	3	-0.013774	-0.0635722	0.0393315	22
	80	2	4	0.0621653	0.026097	0.102604	22
	80	2	5	-0.052046	-0.100714	-0.00483268	22
	80	2	6	0.0346243	-0.00422494	0.0761078	22
	80	2	7	-0.0408171	-0.0779132	-0.00287123	22
	80	2	8	0.000566358	-0.0446906	0.0496566	22
	80	4	1	-0.30524	-0.344631	-0.267059	28
	80	4	2	-0.0407587	-0.0841191	0.000591954	28
	80	4	3	-0.0371638	-0.0745397	0.00311743	28
	80	4	4	0.0303199	-0.00903997	0.0678113	28
	80	4	5	0.00416441	-0.0343404	0.0445541	28
	80	4	6	-0.000236497	-0.0326089	0.0331411	28
	80	4	7	-0.0135624	-0.049649	0.021345	28
	80	4	8	0.0271667	-0.00578544	0.0603155	28
	80	8	1	-0.254563	-0.278706	-0.231013	83
	80	8	2	-0.0916256	-0.118296	-0.0622533	83
	80	8	3	-0.0157593	-0.0426605	0.0111983	83
	80	8	4	0.026683	0.000714177	0.0561626	83
	80	8	5	-0.0292515	-0.058713	-0.00308539	83
	80	8	6	0.00952081	-0.0148939	0.0364055	83
	80	8	7	-0.0306199	-0.0544057	-0.00506927	83
	80	8	8	-0.000762369	-0.0255166	0.0244725	83
100	100	8	1	-0.26956	-0.300573	-0.23688	77
	100	8	2	-0.0443823	-0.0712581	-0.0178751	77
	100	8	3	-0.0312168	-0.0562572	-0.00570292	77
	100	8	4	0.028713	0.00444088	0.0528558	77
	100	8	5	-0.0196392	-0.0456003	0.00495613	77
	100	8	6	0.00460364	-0.0173734	0.0265327	77
	100	8	7	-0.025815	-0.0502829	-0.0023359	77
	100	8	8	0.00757081	-0.0153637	0.0304654	77
120	120	2	1	-0.322387	-0.388831	-0.248633	22
	120	2	2	0.0194526	-0.0394261	0.0957762	22
	120	2	3	-0.0747278	-0.147544	-0.017002	22
	120	2	4	0.113688	0.0628226	0.180217	22
	120	2	5	-0.0444452	-0.118834	0.020525	22
	120	2	6	0.0514267	-0.000699879	0.11599	22
	120	2	7	-0.0495163	-0.11244	-0.00498768	22
	120	2	8	0.0789911	0.020518	0.139652	22
	120	4	1	-0.317504	-0.366789	-0.266832	26
	120	4	2	-0.0459599	-0.0957289	0.00779213	26
	120	4	3	-0.0778202	-0.115893	-0.0438879	26
	120	4	4	0.0733259	0.0433607	0.108789	26
	120	4	5	-0.0316935	-0.0672937	0.000555173	26
	120	4	6	0.0201442	-0.0193722	0.066007	26
	120	4	7	-0.0272244	-0.067616	0.00402492	26
	120	4	8	0.054961	0.0225961	0.0969168	26
	120	8	1	-0.255498	-0.281689	-0.231809	85
	120	8	2	-0.0899944	-0.112316	-0.0671105	85
	120	8	3	-0.0177918	-0.0426674	0.00639399	85
	120	8	4	0.0211946	-0.00311035	0.0446028	85
	120	8	5	-0.0301719	-0.0510522	-0.00956978	85
	120	8	6	0.0196774	-0.000645484	0.0407722	85
	120	8	7	-0.0288192	-0.0469848	-0.0111038	85
	120	8	8	0.0264381	0.00543126	0.0473279	85
160	160	2	1	-0.271113	-0.33398	-0.209117	22
	160	2	2	-0.000639306	-0.0374916	0.0383303	22
	160	2	3	-0.0699635	-0.110899	-0.0301665	22
	160	2	4	0.0747591	0.0360759	0.11686	22
	160	2	5	-0.0384712	-0.089085	0.00829635	22
	160	2	6	0.0511642	0.0134361	0.0924309	22
	160	2	7	-0.0374376	-0.085474	0.00331733	22
	160	2	8	0.0601604	0.0225918	0.10465	22
	160	4	1	-0.168469	-0.282011	-0.0521112	28
	160	4	2	0.0376459	-0.0502038	0.139384	28
	160	4	3	0.0121478	-0.0629383	0.102385	28
	160	4	4	0.16206	0.0963329	0.234562	28
	160	4	5	0.00751349	-0.0670353	0.0894142	28
	160	4	6	0.107408	0.0369464	0.187868	28
	160	4	7	0.0180008	-0.0458297	0.0945034	28
	160	4	8	0.150306	0.0908488	0.221506	28
	160	8	1	-0.215614	-0.251593	-0.182002	83
	160	8	2	-0.0420808	-0.0703985	-0.0126083	83
	160	8	3	-0.0544877	-0.0763938	-0.0317018	83
	160	8	4	0.0464977	0.0251374	0.0679111	83
	160	8	5	-0.0116492	-0.0291626	0.0049914	83
	160	8	6	0.0286087	0.00785858	0.0490829	83
	160	8	7	-0.01276	-0.0329749	0.00932419	83
	160	8	8	0.0276729	0.00852897	0.0473436	83
200	200	2	1	-0.278078	-0.319707	-0.238627	22
	200	2	2	-0.0243817	-0.056245	0.00736476	22
	200	2	3	-0.0668571	-0.108786	-0.0252468	22
	200	2	4	0.0413335	-0.0126484	0.0999402	22
	200	2	5	-0.0358916	-0.0686898	-0.00412388	22
	200	2	6	0.0406674	0.0166454	0.0686969	22
	200	2	7	-0.0188492	-0.0612943	0.0216802	22
	200	2	8	0.0782328	0.0320754	0.13105	22
	200	4	1	-0.255271	-0.312241	-0.195649	28
	200	4	2	-0.0373708	-0.0766947	0.00271625	28
	200	4	3	-0.0892031	-0.12137	-0.0599915	28
	200	4	4	0.0637387	0.0292115	0.102796	28
	200	4	5	-0.0512369	-0.0847751	-0.0176159	28
	200	4	6	0.00795359	-0.0189665	0.0351014	28
	200	4	7	-0.0450994	-0.0734227	-0.0187206	28
	200	4	8	0.0733681	0.0320668	0.11629	28
	200	8	1	-0.136728	-0.172047	-0.101992	84
	200	8	2	-0.0596589	-0.0895499	-0.0288525	84
	200	8	3	-0.0770617	-0.0969849	-0.0560812	84
	200	8	4	0.0414489	0.0220019	0.0627256	84
	200	8	5	-0.00192034	-0.0215667	0.0178775	84
	200	8	6	0.0159101	0.00194596	0.0296324	84
	200	8	7	0.00348574	-0.0130714	0.0201934	84
	200	8	8	0.0444828	0.0261935	0.0639844	84
240	240	2	1	-0.242154	-0.31374	-0.171196	22
	240	2	2	-0.0191391	-0.0700739	0.034224	22
	240	2	3	-0.0962934	-0.149918	-0.0425887	22
	240	2	4	0.0538722	0.00575705	0.108082	22
	240	2	5	-0.0533554	-0.095401	-0.0161523	22
	240	2	6	0.0306545	-0.00904583	0.0755449	22
	240	2	7	-0.0197347	-0.0710553	0.0209907	22
	240	2	8	0.0653472	0.0263439	0.111814	22
	240	4	1	-0.21113	-0.262889	-0.154729	27
	240	4	2	-0.0483074	-0.090078	-0.00237597	27
	240	4	3	-0.0627203	-0.0961135	-0.0323375	27
	240	4	4	0.0401671	-0.000351903	0.0870893	27
	240	4	5	-0.0250072	-0.0638823	0.0112435	27
	240	4	6	0.0163736	-0.0115513	0.0458743	27
	240	4	7	-0.012282	-0.0412452	0.016727	27
	240	4	8	0.0565815	0.0184596	0.0965219	27
