# Supplementary material for: Collective dynamics support group drumming, reduce variability, and stabilize tempo drift
Source: eLife. 2022 Nov 1;11:e74816. doi: 10.7554/eLife.74816 (PMC9678363; doi:10.7554/eLife.74816)
Supplement: Figure 6—source data 1. [file elife-74816-fig6-data1.xlsx]

## Sheet: fig 6
Group Size	Lag	Mean	95 % CI		n
2	-4	0.0423779	0.0210067	0.0649962	44
2	-3	0.0784383	0.0565483	0.100936	44
2	-2	0.115047	0.0905983	0.139893	44
2	-1	0.160897	0.124193	0.197057	44
2	0	-0.0872699	-0.117333	-0.0601556	44
2	1	0.179036	0.14162	0.220923	44
2	2	0.145067	0.118532	0.170268	44
2	3	0.0819949	0.0545869	0.110487	44
2	4	0.0549885	0.0303132	0.0797348	44
4	-4	0.0437945	0.029714	0.058957	140
4	-3	0.0696983	0.0574712	0.082135	140
4	-2	0.0838975	0.0684975	0.0998896	140
4	-1	0.109582	0.0933644	0.126004	140
4	0	0.0102151	-0.00547137	0.0256442	140
4	1	0.0861174	0.0697221	0.104582	140
4	2	0.0691243	0.0554754	0.081574	140
4	3	0.0575839	0.0444047	0.0705659	140
4	4	0.029244	0.015922	0.0421801	140
8	-4	0.0227187	0.0179017	0.0274665	1479
8	-3	0.0294829	0.0251855	0.0343024	1479
8	-2	0.0441043	0.0392653	0.048913	1479
8	-1	0.0491103	0.0444531	0.0537212	1479
8	0	0.0314068	0.0262904	0.0361134	1479
8	1	0.042411	0.0378038	0.0476044	1479
8	2	0.0451962	0.0399274	0.050338	1479
8	3	0.032636	0.0280815	0.0372357	1479
8	4	0.0208269	0.0160028	0.0250575	1479

## Sheet: fig 6-figure supplement 1
Panel	BPM	Group Size	Lag	Mean	95 % CI		n
50	50	2	-4	-0.106732	-0.175105	-0.0343706	10
	50	2	-3	-0.0324526	-0.106077	0.040383	10
	50	2	-2	0.0141097	-0.0489287	0.0681865	10
	50	2	-1	0.317116	0.263624	0.369472	10
	50	2	0	-0.0415844	-0.1122	0.0346405	10
	50	2	1	0.308493	0.18213	0.433498	10
	50	2	2	0.0700512	-0.0615597	0.187126	10
	50	2	3	-0.0220733	-0.0958939	0.0427427	10
	50	2	4	-0.0667673	-0.107412	-0.0246997	10
	50	4	-4	0.00516836	-0.0435197	0.0495371	19
	50	4	-3	0.0317272	-0.0343839	0.099289	19
	50	4	-2	0.0631097	-0.0368978	0.150982	19
	50	4	-1	0.10525	0.0238044	0.177279	19
	50	4	0	0.0381374	-0.0330996	0.110703	19
	50	4	1	0.0185723	-0.0566722	0.0960716	19
	50	4	2	0.0356745	-0.039144	0.105375	19
	50	4	3	-0.0356347	-0.126325	0.0663781	19
	50	4	4	0.010858	-0.0426668	0.0654716	19
80	80	2	-4	-0.00173163	-0.0373562	0.0350986	11
	80	2	-3	0.0423328	-0.0096044	0.100415	11
	80	2	-2	0.0984008	0.0489265	0.143695	11
	80	2	-1	0.245574	0.172732	0.311008	11
	80	2	0	-0.178397	-0.242069	-0.110115	11
	80	2	1	0.282969	0.210843	0.358683	11
	80	2	2	0.110665	0.0632843	0.167734	11
	80	2	3	-0.00682013	-0.0516229	0.0366533	11
	80	2	4	0.00120709	-0.0547348	0.0720596	11
	80	4	-4	0.0522881	0.0220834	0.081402	36
	80	4	-3	0.058793	0.0300121	0.0912093	36
	80	4	-2	0.0886048	0.0464577	0.12558	36
	80	4	-1	0.155294	0.11234	0.195494	36
	80	4	0	0.00755125	-0.0389153	0.053199	36
	80	4	1	0.143022	0.0964957	0.191237	36
	80	4	2	0.0809474	0.0603583	0.100553	36
	80	4	3	0.058152	0.0269283	0.0899275	36
	80	4	4	0.00396956	-0.0272965	0.0335993	36
	80	8	-4	0.00680291	-0.0088113	0.0228106	248
	80	8	-3	0.0239118	0.00845704	0.0402686	248
	80	8	-2	0.0506185	0.0360695	0.0653447	248
	80	8	-1	0.0678128	0.0532253	0.084178	248
	80	8	0	0.0374149	0.0241347	0.0507274	248
	80	8	1	0.0715231	0.0545011	0.0874868	248
	80	8	2	0.0607053	0.0454334	0.0756653	248
	80	8	3	0.0261759	0.0109297	0.0417584	248
	80	8	4	0.0102196	-0.00380979	0.0253371	248
100	100	8	-4	0.0243582	0.0112673	0.0374131	232
	100	8	-3	0.033565	0.0218234	0.0456605	232
	100	8	-2	0.0578748	0.0450161	0.0706879	232
	100	8	-1	0.0697946	0.0563392	0.0833097	232
	100	8	0	0.0256563	0.0112427	0.0409013	232
	100	8	1	0.0569838	0.0428158	0.0702676	232
	100	8	2	0.0474104	0.0353483	0.0587108	232
	100	8	3	0.0288345	0.0150265	0.0428184	232
	100	8	4	0.0374448	0.0250647	0.0483766	232
120	120	2	-4	0.0196777	-0.0222515	0.0622038	11
	120	2	-3	0.0969545	0.0419798	0.148375	11
	120	2	-2	0.119256	0.070113	0.170793	11
	120	2	-1	0.189297	0.131034	0.244853	11
	120	2	0	-0.112981	-0.139792	-0.0841804	11
	120	2	1	0.230615	0.166588	0.296431	11
	120	2	2	0.142625	0.0985884	0.18925	11
	120	2	3	0.118216	0.070748	0.162436	11
	120	2	4	0.033531	-0.00543573	0.0758067	11
	120	4	-4	0.0228845	-0.00208328	0.0474401	32
	120	4	-3	0.0842418	0.0581972	0.11706	32
	120	4	-2	0.0899603	0.0617521	0.114894	32
	120	4	-1	0.117533	0.0878577	0.147106	32
	120	4	0	0.00224907	-0.0274806	0.0288918	32
	120	4	1	0.0978967	0.0691051	0.125731	32
	120	4	2	0.085992	0.0577932	0.114282	32
	120	4	3	0.0717961	0.0484161	0.0968985	32
	120	4	4	0.0154137	-0.0134888	0.0428709	32
	120	8	-4	0.0192349	0.00728873	0.030445	260
	120	8	-3	0.0219813	0.0104105	0.0334578	260
	120	8	-2	0.0471425	0.0363978	0.0583789	260
	120	8	-1	0.0573831	0.0457413	0.068948	260
	120	8	0	0.0226106	0.00849382	0.0369589	260
	120	8	1	0.0534952	0.04251	0.0655347	260
	120	8	2	0.0439769	0.0313908	0.0562694	260
	120	8	3	0.0295895	0.0189423	0.0405711	260
	120	8	4	0.023165	0.0131346	0.0334562	260
160	160	2	-4	0.0656129	0.0338525	0.105394	11
	160	2	-3	0.0833456	0.038286	0.122769	11
	160	2	-2	0.111229	0.0636366	0.161649	11
	160	2	-1	0.155285	0.0968972	0.213701	11
	160	2	0	-0.0237942	-0.0602209	0.0158757	11
	160	2	1	0.138836	0.084945	0.193777	11
	160	2	2	0.179375	0.125852	0.236491	11
	160	2	3	0.132691	0.0886031	0.17471	11
	160	2	4	0.0797751	0.0466605	0.112012	11
	160	4	-4	0.0694469	0.0450633	0.100276	36
	160	4	-3	0.0748969	0.0526598	0.0954986	36
	160	4	-2	0.0969238	0.0703057	0.121718	36
	160	4	-1	0.100769	0.0703964	0.128336	36
	160	4	0	0.028417	0.00270109	0.0525384	36
	160	4	1	0.0629862	0.0332961	0.0891461	36
	160	4	2	0.0717094	0.0433333	0.0973958	36
	160	4	3	0.048632	0.0243321	0.0721954	36
	160	4	4	0.0525016	0.0298525	0.0753446	36
	160	8	-4	0.0283585	0.0179094	0.0387601	248
	160	8	-3	0.0413843	0.0313284	0.0519661	248
	160	8	-2	0.0358858	0.025203	0.0466144	248
	160	8	-1	0.0352744	0.0252101	0.0459114	248
	160	8	0	0.0354163	0.0235554	0.0467919	248
	160	8	1	0.0348983	0.0243351	0.0459889	248
	160	8	2	0.0448226	0.0346496	0.0540289	248
	160	8	3	0.0409147	0.0312626	0.0511072	248
	160	8	4	0.0316986	0.0221484	0.0419277	248
200	200	2	-4	0.0859524	0.0357444	0.128365	11
	200	2	-3	0.0911205	0.0646986	0.117411	11
	200	2	-2	0.131302	0.0785014	0.18248	11
	200	2	-1	0.0534321	0.00330463	0.117494	11
	200	2	0	-0.033907	-0.0650083	-0.00268576	11
	200	2	1	0.0637227	0.0281483	0.102415	11
	200	2	2	0.147604	0.102057	0.195807	11
	200	2	3	0.0838933	0.0395338	0.121836	11
	200	2	4	0.105441	0.078171	0.130715	11
	200	4	-4	0.0282352	0.00215512	0.0541199	36
	200	4	-3	0.0624775	0.0425066	0.0822593	36
	200	4	-2	0.0607749	0.028434	0.0916395	36
	200	4	-1	0.0656163	0.0399997	0.0923112	36
	200	4	0	0.00175812	-0.020437	0.0239976	36
	200	4	1	0.0418734	0.0210437	0.0642583	36
	200	4	2	0.0397227	0.0188871	0.0626498	36
	200	4	3	0.0533347	0.0295311	0.0770432	36
	200	4	4	0.0435545	0.0215746	0.0669525	36
	200	8	-4	0.0342423	0.0253301	0.0430125	254
	200	8	-3	0.0305911	0.0222005	0.0394043	254
	200	8	-2	0.039829	0.0313279	0.0483607	254
	200	8	-1	0.028357	0.0184907	0.0372267	254
	200	8	0	0.0319792	0.0229815	0.0406595	254
	200	8	1	0.0241561	0.0154437	0.0329951	254
	200	8	2	0.04021	0.0315579	0.050005	254
	200	8	3	0.0322999	0.0232926	0.0407009	254
	200	8	4	0.0272819	0.0176976	0.0356506	254
240	240	2	-4	0.102731	0.0575562	0.146134	11
	240	2	-3	0.0987634	0.042233	0.157718	11
	240	2	-2	0.151992	0.108274	0.201191	11
	240	2	-1	0.0161351	-0.0245747	0.0564794	11
	240	2	0	-0.0326119	-0.0634042	-0.0019707	11
	240	2	1	-0.039935	-0.0743227	0.00212764	11
	240	2	2	0.136395	0.0874362	0.188887	11
	240	2	3	0.0583503	-0.00576064	0.118992	11
	240	2	4	0.0583617	0.0248987	0.0887847	11
	240	4	-4	0.0646164	0.04386	0.0857863	34
	240	4	-3	0.053235	0.0303498	0.0785231	34
	240	4	-2	0.0656166	0.040197	0.0886954	34
	240	4	-1	0.026243	0.00476367	0.0480218	34
	240	4	0	0.0163055	-0.00571887	0.0353174	34
	240	4	1	0.0360712	0.0128068	0.0607438	34
	240	4	2	0.0718759	0.0438883	0.103656	34
	240	4	3	0.0357098	0.00883457	0.0623658	34
	240	4	4	0.0487242	0.0257078	0.0729506	34
