# Supplementary material for: Collective dynamics support group drumming, reduce variability, and stabilize tempo drift
Source: eLife. 2022 Nov 1;11:e74816. doi: 10.7554/eLife.74816 (PMC9678363; doi:10.7554/eLife.74816)
Supplement: Figure 7—source data 1. [file elife-74816-fig7-data1.xlsx]

## Sheet: fig 7
Panel A
Group Size	Mean	SEM	n
2	0.00802121	0.000490912	44
4	0.00635912	0.000364768	32
8	0.00446571	0.000154019	67
Panel B
Group Size	Mean	SEM	n
2	0.00802121	0.000490912	44
4	0.0154952	0.00116752	32
8	0.0276492	0.00102328	67
